# Supplementary material for: N, S and P-ternary doped carbon nano-pore/tube composites derived from natural chemicals in waste sweet osmanthus fruit with superior activity for oxygen reduction in acidic and alkaline media
Source: Royal Society of Chemistry journal article supplement (doi:10.1039/c6ra08371d), 2016-01-01
Supplement: c6ra08371d1.pdf [file c6ra08371d1.pdf]

## Supporting Information

### **N, S and P-ternary doped carbon nano-pore/tubes composites derived from natural chemicals in the waste sweet osmanthus fruit with superior activity for oxygen reduction in acidic and alkaline media**

Ziwu Liu\*, Fang Wang, Meng Li, Zhong-Hai Ni\*

Low Carbon Energy Institute and School of Chemical Engineering, China University of Mining & Technology, Xuzhou 221008, Jiangsu, China

\*Corresponding author, Email address: lzwmsy@cumt.edu.cn, nizhonghai@cumt.edu.cn, Fax: +86-516-83883501.

#### **1. Supplemental Table and Figures**

**Table S1** Main elemental composition, pore size and volume and BET surface area of each synthesized sample.

| Samples     | EDS (wt.%) |       |      |      |      | Pore diameter (nm) |                    |                   | Pore volume (cm <sup>3</sup> /g) |             |            | S <sub>BET</sub> (m <sup>2</sup> /g) |
|-------------|------------|-------|------|------|------|--------------------|--------------------|-------------------|----------------------------------|-------------|------------|--------------------------------------|
|             | C          | O     | N    | S    | P    | $\bar{d}$          | Micropore <i>d</i> | Mesopore <i>d</i> | Total V                          | Micropore V | Mesopore V |                                      |
| NSP-NPC     | 67.33      | 11.15 | 0.32 | 6.39 | 0.54 | 3.30               | 0.44               | 3.82              | 0.38                             | 0.18        | 0.16       | 462.71                               |
| NS-CNPTCs   | 73.47      | 3.02  | 3.54 | 0.29 | -    | 29.68              | 0.50               | 3.82              | 0.18                             | 0.01        | 0.07       | 24.71                                |
| NSP-CNPTCs1 | 68.83      | 8.14  | 5.20 | 0.46 | 0.53 | 8.41               | 0.59               | 3.83              | 0.61                             | 0.12        | 0.30       | 289.08                               |
| NSP-CNPTCs2 | 74.19      | 4.36  | 5.77 | 0.40 | 0.34 | 15.40              | 0.50               | 3.69              | 0.93                             | 0.10        | 0.47       | 295.28                               |
| NSP-CNPTCs3 | 70.25      | 8.79  | 4.07 | 0.36 | 0.39 | 18.28              | 0.41               | 3.82              | 1.32                             | 0.12        | 0.71       | 288.30                               |

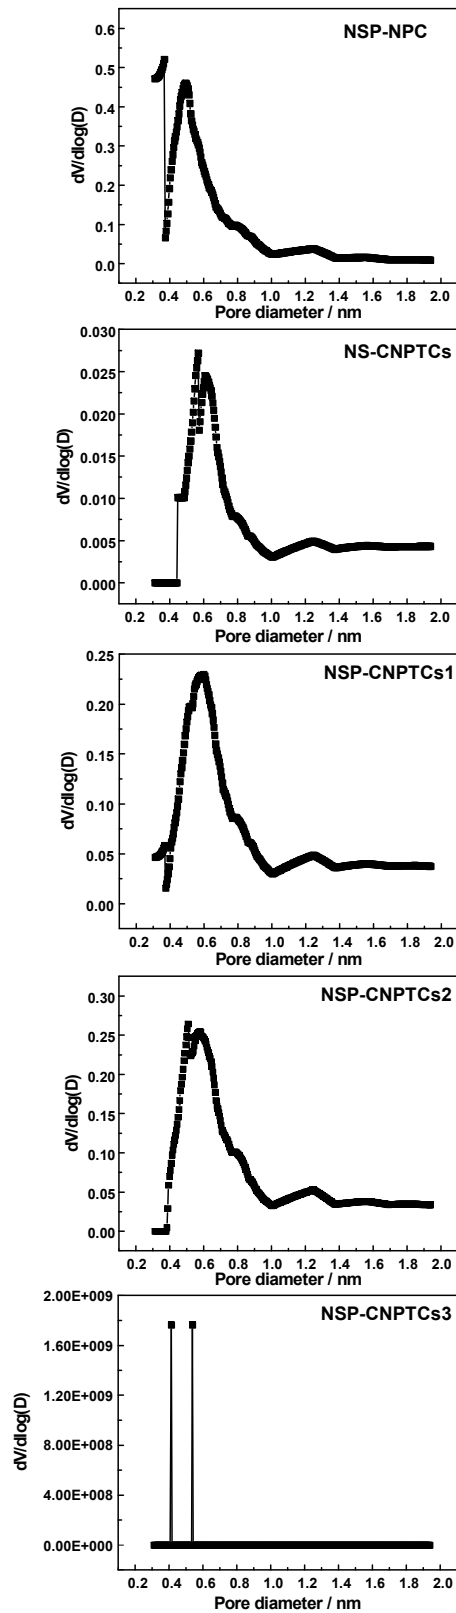

**Figure S1.** The micro-pore size distributions of the NSP-NPC, NS-CNPTCs, NSP-CNPTCs1, NSP-CNPTCs2 and NSP-CNPTCs3.

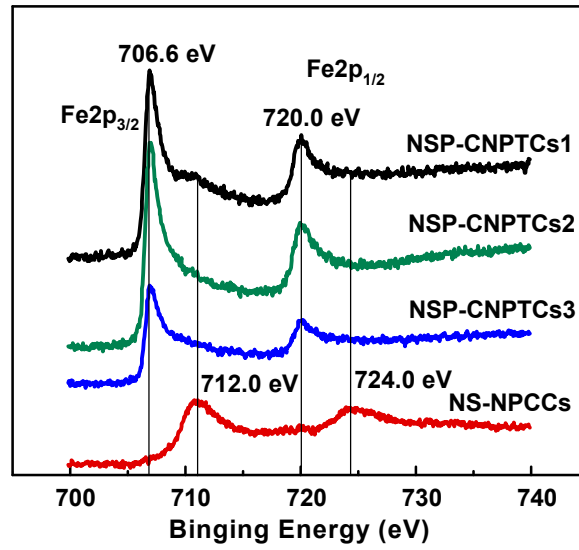

**Figure S2.** The Fe2p spectra of NS-CNPTCs, NSP-CNPTCs1, NSP-CNPTCs2 and NSP-CNPTCs3.

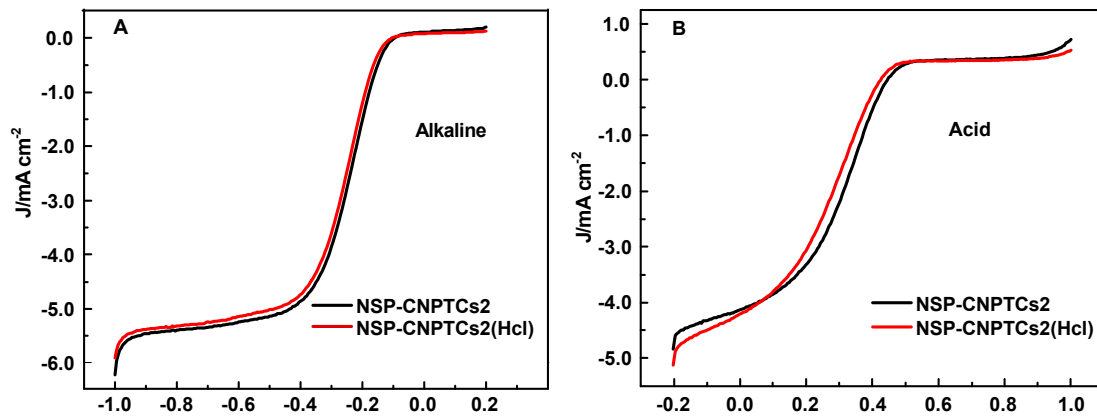

**Figure S3.** The ORR activity changes of NSP-CNPTCs2 before and after the removing of Fe in NSP-CNPTCs2 in 12 M HCl solution for 2 h.

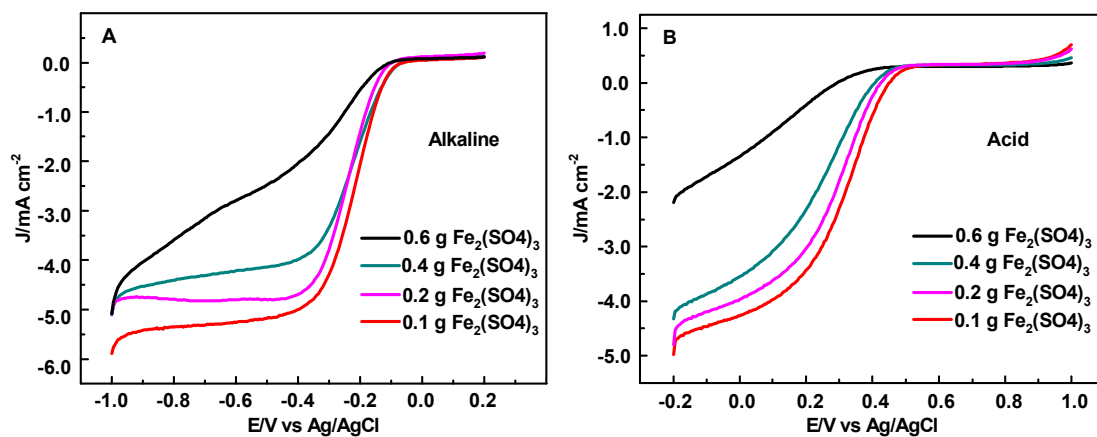

**Figure S4.** The ORR activities of NSP-CNPTCs synthesized by different amounts of  $\text{Fe}_2(\text{SO}_4)_3$  catalysts.
